# Supplementary material
Source: publisher site journal article supplement (https://static.cambridge.org/content/id/urn:cambridge.org:id:article:S136510052000005X/resource/name/S136510052000005Xsupp001.pdf)
Supplement: Supplementary file 1 [file S136510052000005Xsupp001.pdf]

# A Note on the Relation between Search Costs and Search Duration for New Hires – Online Appendix

Francesco Carbonero and Hermann Gartner

January 7, 2020

Table 1 presents descriptive statistics across industries, Table 2 presents the coefficients for industries of Model 3, Table 3 and the following Tables present robustness checks.

Table 1: Descriptive statistics across industries

| Sectors                                                                   | Monetary search costs (Euros) |         | Search hours |      | Search duration (days) |      | Comp. search costs (Euros) |         |
|---------------------------------------------------------------------------|-------------------------------|---------|--------------|------|------------------------|------|----------------------------|---------|
|                                                                           |                               |         |              |      |                        |      |                            |         |
| Financial services, insurance                                             | 5110                          | (17007) | 22           | (23) | 84                     | (81) | 6179                       | (17261) |
| Machinery and equipment, electrical equipment and motor vehicles          | 2907                          | (7294)  | 19           | (17) | 69                     | (54) | 3759                       | (7945)  |
| Information and communication                                             | 1378                          | (3010)  | 25           | (32) | 70                     | (70) | 2573                       | (3790)  |
| Mining and quarrying, electricity, gas, steam and air conditioning supply | 1432                          | (3089)  | 20           | (19) | 72                     | (68) | 2450                       | (3469)  |
| Coke and refined petroleum products, chemicals and plastic products       | 1271                          | (3198)  | 22           | (62) | 52                     | (51) | 2184                       | (4686)  |
| Professional, scientific and technical activities                         | 1142                          | (2735)  | 20           | (18) | 73                     | (72) | 1959                       | (3196)  |
| Food; textile, clothes and furniture                                      | 1219                          | (4081)  | 17           | (21) | 56                     | (63) | 1780                       | (4555)  |
| Wood, paper and printing                                                  | 977                           | (3313)  | 20           | (26) | 74                     | (96) | 1701                       | (3585)  |
| Public administration and defense; compulsory social security             | 720                           | (1228)  | 23           | (23) | 65                     | (60) | 1670                       | (1743)  |
| Water supply; sewerage, waste management and remediation activities       | 880                           | (1593)  | 22           | (37) | 66                     | (67) | 1647                       | (2263)  |
| Wholesale and retail trade; repair of motor vehicles and motorcycles      | 1043                          | (3252)  | 18           | (25) | 61                     | (61) | 1640                       | (3856)  |
| Real estate activities                                                    | 975                           | (2214)  | 20           | (18) | 60                     | (56) | 1637                       | (2450)  |
| Arts, entertainment, recreation                                           | 773                           | (2451)  | 22           | (23) | 58                     | (52) | 1561                       | (3045)  |
| Basic metals, fabricated metal products                                   | 904                           | (2734)  | 18           | (20) | 75                     | (78) | 1547                       | (2919)  |
| Transportation and storage                                                | 584                           | (1559)  | 23           | (38) | 67                     | (79) | 1438                       | (2416)  |
| Education                                                                 | 547                           | (1331)  | 26           | (39) | 65                     | (59) | 1415                       | (1908)  |
| Other services                                                            | 442                           | (1060)  | 18           | (17) | 66                     | (70) | 1052                       | (1481)  |
| Human health and social work activities                                   | 569                           | (2171)  | 15           | (18) | 70                     | (97) | 981                        | (2244)  |
| Construction                                                              | 341                           | (895)   | 16           | (23) | 81                     | (87) | 875                        | (1322)  |
| Accommodation and food service activities                                 | 343                           | (1250)  | 18           | (29) | 64                     | (66) | 765                        | (1511)  |
| Administrative and support service activities                             | 289                           | (817)   | 19           | (35) | 63                     | (85) | 741                        | (1185)  |
| Agriculture, forestry and fishing                                         | 189                           | (923)   | 15           | (19) | 67                     | (74) | 588                        | (1130)  |
| Overall mean                                                              | 920                           | (3652)  | 19           | (28) | 67                     | (75) | 1576                       | (4051)  |

Mean and standard deviation (in parenthesis), weighted values. 9,048 observations. Source: German Job Vacancy Survey 2014 and 2015. The survey weights are based on strata for 23 economic sectors and 7 firm size classes.

Table 2: Sector coefficients of Model 3

| Dependent variable:                                                       | log of compounded search costs |
|---------------------------------------------------------------------------|--------------------------------|
| Agriculture, forestry and fishing                                         | -0.73***<br>(0.10)             |
| Food; textile, clothes and furniture                                      | -0.36***<br>(0.08)             |
| Wood, paper and printing                                                  | -0.2*<br>(0.09)                |
| Coke and refined petroleum products, chemicals and plastic products       | -0.08<br>(0.08)                |
| Basic metals, fabricated metal products                                   | -0.31***<br>(0.08)             |
| Machinery and equipment, electrical equipment and motor vehicles          | -                              |
| Mining and quarrying; electricity, gas, steam and air conditioning supply | 0.25<br>(0.08)                 |
| Water supply; sewerage, waste management and remediation activities       | -0.08***<br>(0.08)             |
| Construction                                                              | -0.35<br>(0.08)                |
| Wholesale and retail trade; repair of motor vehicles and motorcycles      | -0.29***<br>(0.08)             |
| Transportation and storage                                                | -0.33***<br>(0.09)             |
| Accommodation and food service activities                                 | -0.7***<br>(0.08)              |
| Information and communication                                             | 0.24***<br>(0.08)              |
| Financial services, insurance                                             | 0.17**<br>(0.08)               |
| Real estate activities                                                    | 0.3*<br>(0.08)                 |
| Professional, scientific and technical activities                         | 0.03***<br>(0.07)              |
| Administrative and support service activities                             | -0.57<br>(0.07)                |
| Public administration and defense; compulsory social security             | -0.12***<br>(0.07)             |
| Education                                                                 | -0.36<br>(0.08)                |
| Human health and social work activities                                   | -0.57***<br>(0.07)             |
| Arts, entertainment, recreation                                           | -0.23***<br>(0.09)             |
| Other services                                                            | -0.11**<br>(0.08)              |

Robust standard errors in parentheses. Reference group: Machinery and equipment, electrical equipment and motor vehicles.  
Significance levels: \*, \*\* and \*\*\* indicate significance at 0.05, 0.01 and 0.001

Table 3: OLS and IV regressions: Search cost and search duration for academics, vocational training and no qualification

| Dependent variable:            | Academics |        | Vocational training |        | No qualification |        |
|--------------------------------|-----------|--------|---------------------|--------|------------------|--------|
|                                | OLS       | IV     | OLS                 | IV     | OLS              | IV     |
| log of compounded search costs |           |        |                     |        |                  |        |
| log of search duration         | 0.16***   | -0.11  | 0.21***             | -0.20  | 0.20             | 0.20   |
| SE                             | (0.03)    | (0.36) | (0.01)              | (0.28) | (0.03)           | (0.83) |
| R <sup>2</sup>                 | 0.41      | 0.37   | 0.34                | 0.22   | 0.23             | 0.24   |
| N                              | 1861      | 1861   | 6584                | 6584   | 1317             | 1317   |

Robust standard errors in parentheses. 9,048 observations. Controls are the same as in the table in the text. Significance levels: \*, \*\*, \*\*\* indicate significance at 0.05, 0.01 and 0.001.

Table 4: OLS and IV regressions: Search cost and search duration for manufacturing and services

| Dependent variable:            | Manufacturing |        | Services |        |
|--------------------------------|---------------|--------|----------|--------|
|                                | OLS           | IV     | OLS      | IV     |
| log of compounded search costs |               |        |          |        |
| log of search duration         | 0.22***       | -0.25  | 0.19***  | -0.30  |
| SE                             | (0.02)        | (0.31) | (0.02)   | (0.28) |
| R <sup>2</sup>                 | 0.41          | 0.29   | 0.38     | 0.24   |
| N                              | 4244          | 4244   | 5204     | 5204   |

Robust standard errors in parentheses. 9,048 observations. Controls are the same as in the table in the text. Significance levels: \*, \*\*, \*\*\* indicate significance at 0.05, 0.01 and 0.001.

Table 5: OLS regression: Search cost and search duration, reference specification vs 3-digit occupational fixed effects

| Dependent variable:            | Ref. specification | Occupational fixed effects |
|--------------------------------|--------------------|----------------------------|
| log of compounded search costs |                    |                            |
| log of search duration         | 0.20               | 0.20                       |
| SE                             | (0.01)             | (0.01)                     |
| R <sup>2</sup>                 | 0.39               | 0.29                       |
| N                              | 9048               | 9048                       |

Robust standard errors in parentheses. 9,048 observations. Controls are the same as in the table in the text. Significance levels: \*, \*\*, \*\*\* indicate significance at 0.05, 0.01 and 0.001.

Table 6: IV regressions: Search cost and search duration with instruments tightness and vacancy-unemployment separately

| Dependent variable:            | tightness | $\ln v, \ln u$ |
|--------------------------------|-----------|----------------|
| log of compounded search costs |           |                |
| log of search duration         | -0.35     | -0.35          |
| SE                             | (0.25)    | (0.23)         |
| R <sup>2</sup>                 | 0.22      | 0.22           |
| N                              | 9048      | 9048           |

Robust standard errors in parentheses. 9,048 observations. Controls are the same as in the table in the text. Significance levels: \*, \*\*, \*\*\* indicate significance at 0.05, 0.01 and 0.001.
